# Supplementary material for: Intracellular galectin-3 is a lipopolysaccharide sensor that promotes glycolysis through mTORC1 activation
Source: Springer Nature journal article supplement (doi:10.1038/s41467-022-35334-x), 2022-12-08
Supplement: MOESM1 [file 41467_2022_35334_MOESM1_ESM.pdf]

# Supplementary Fig. 1

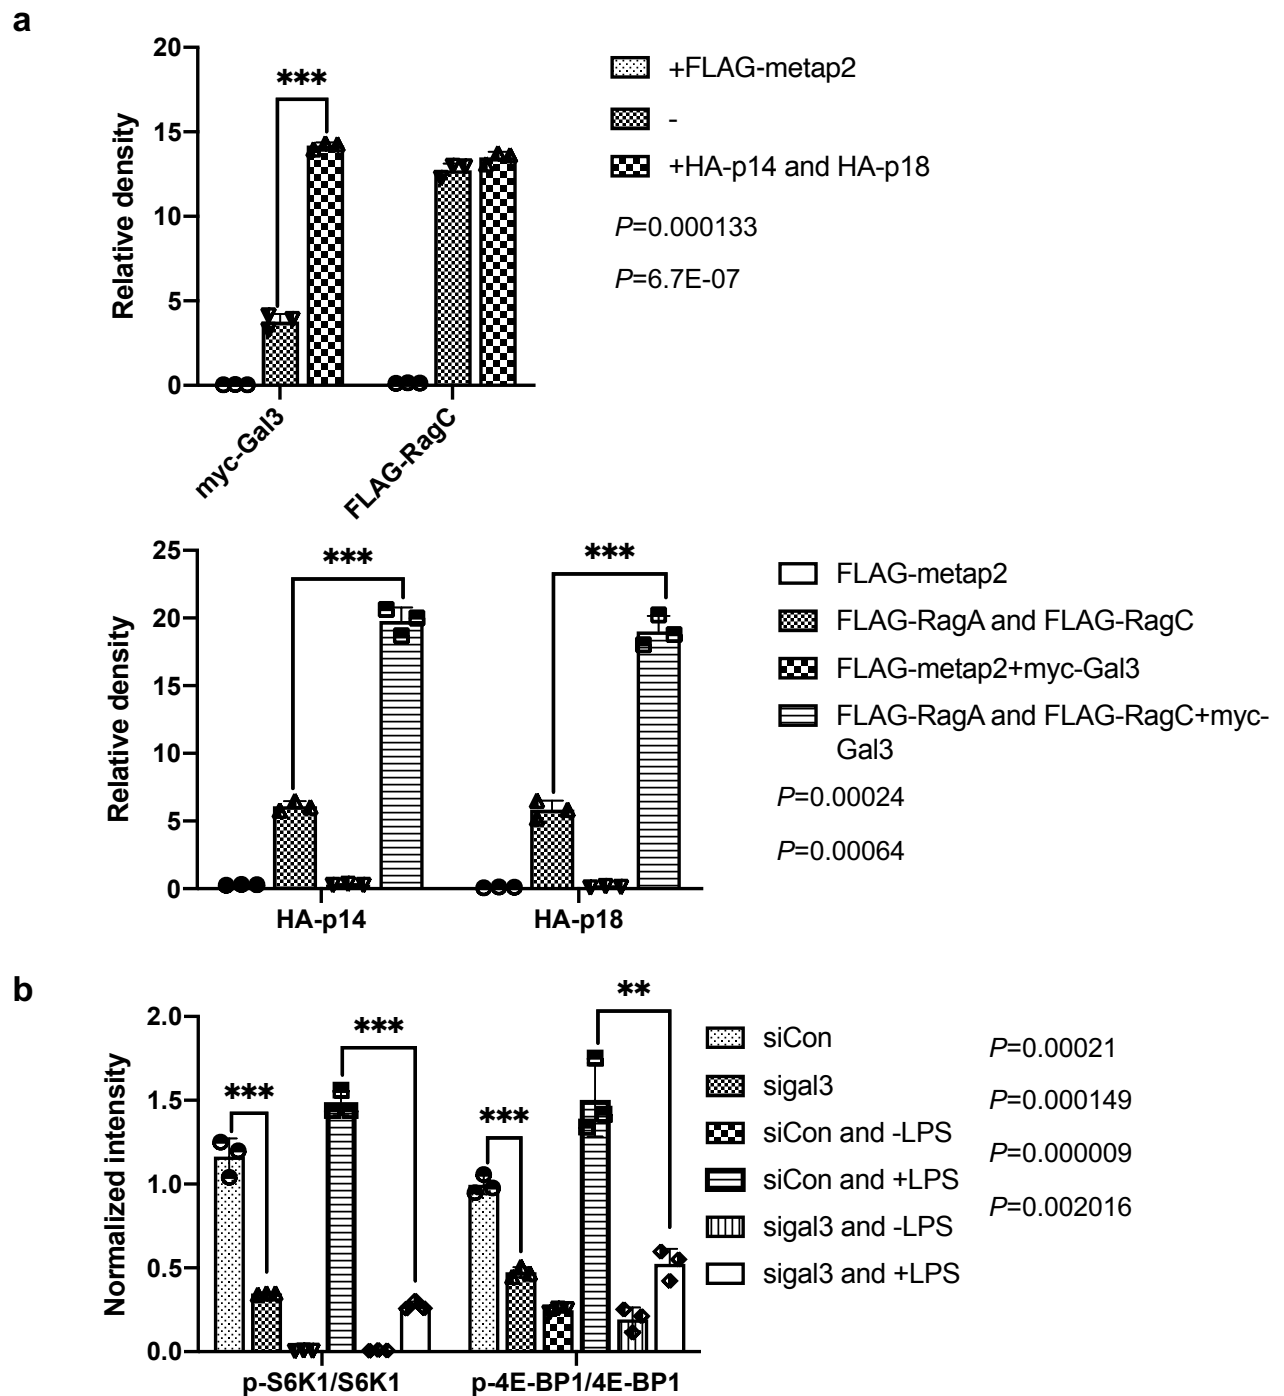

**Supplementary Fig. 1. Galectin-3 facilitates the interaction of Rag GTPases and Regulator to stimulate the mTORC1 signaling.** **a** Quantitative analysis of the immunoblots in Fig. 2a. Each bar represents the mean  $\pm$  SD for biological triplicate experiments.  $P$  values were calculated by two-tailed unpaired Student's  $t$  test (\*\*\* $P < 0.001$ ). **b** Quantitative analysis of the ratio of p-S6K1/S6K1 and p-4E-BP1/4E-BP1 in Fig. 2d. Error bars represent mean  $\pm$  SD for biological triplicate experiments.  $P$  values were calculated by two-tailed unpaired Student's  $t$  test (\*\* $P < 0.01$ , \*\*\* $P < 0.001$ ).

## Supplementary Fig. 2

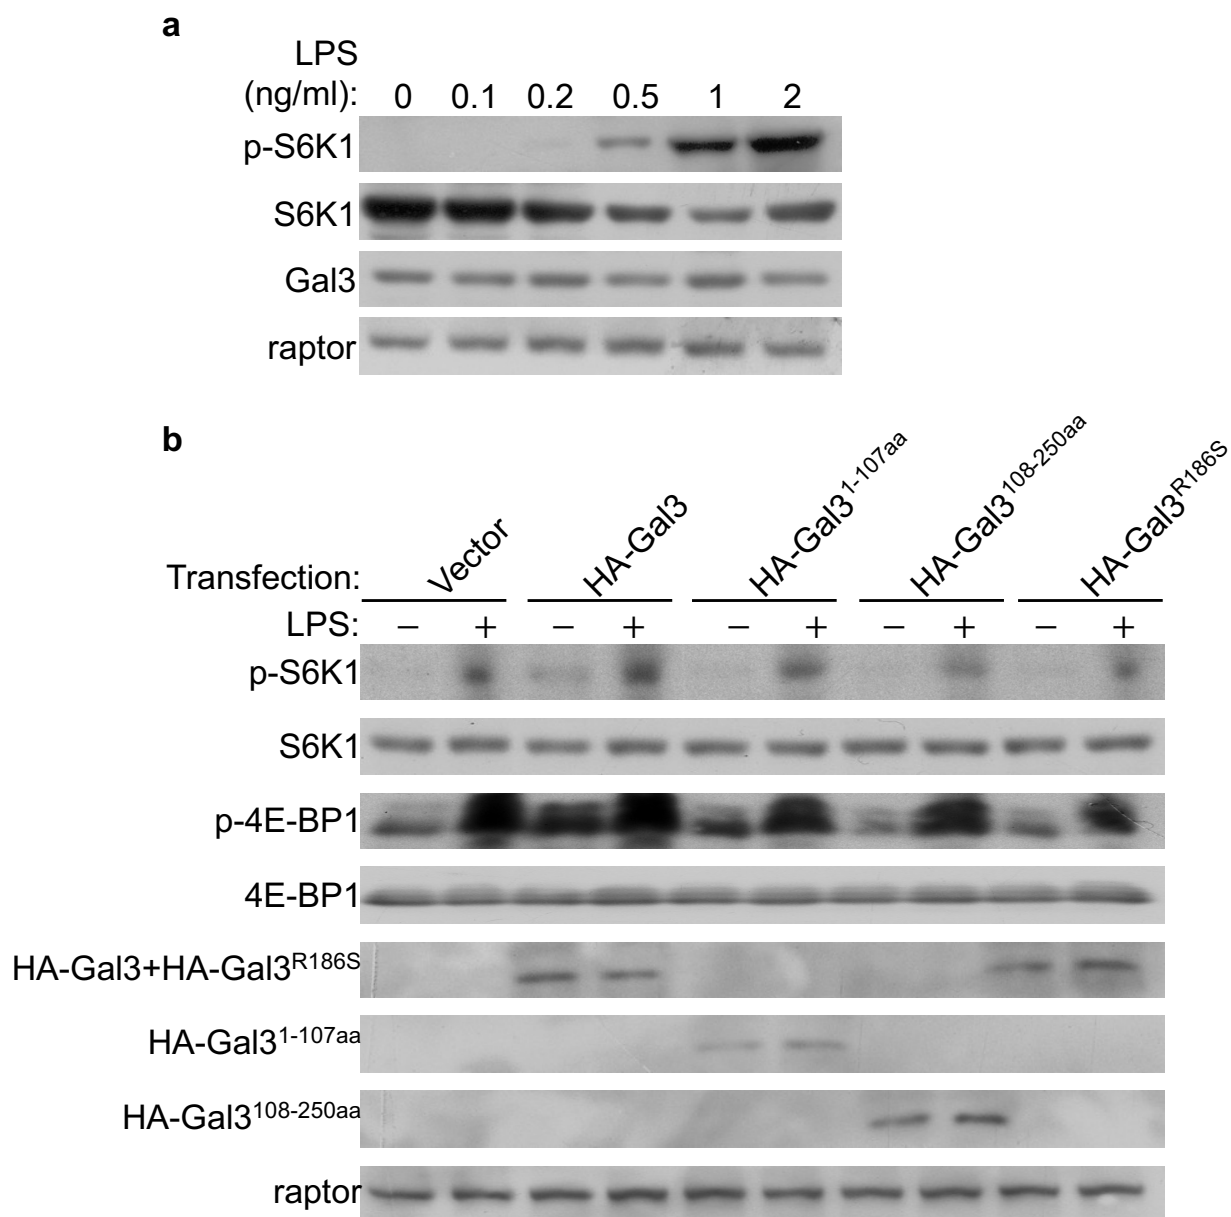

**Supplementary Fig. 2. Galectin-3 senses LPS to activate mTORC1.** **a** HEK-293T were treated with different concentrations of LPS for western blotting analysis of the expression or phosphorylation of the indicated proteins. Each experiment was repeated three times with similar results. **b** HEK-293T cells were transfected with HA-Gal3, HA-Gal3<sup>1-107aa</sup> (N-terminal domain), HA-Gal3<sup>108-250aa</sup> (C-terminal carbohydrate recognition domain), or HA-Gal3<sup>R186S</sup>, starved of amino acids and glucose for 1 h, and stimulated with LPS (1 µg/ml) for 5 h for western blotting analysis of the expression or phosphorylation of the indicated proteins. Each experiment was repeated three times with similar results.

### Supplementary Fig. 3

**a**

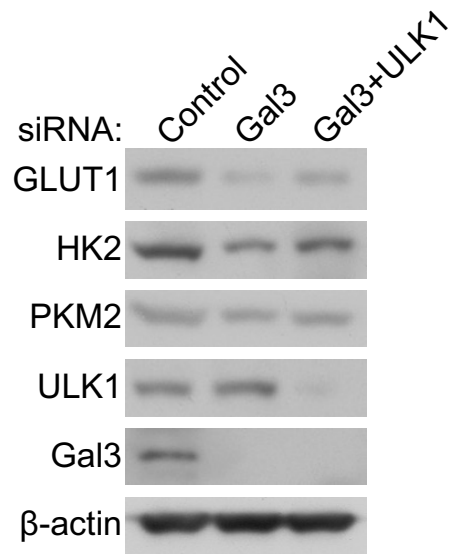

**b**

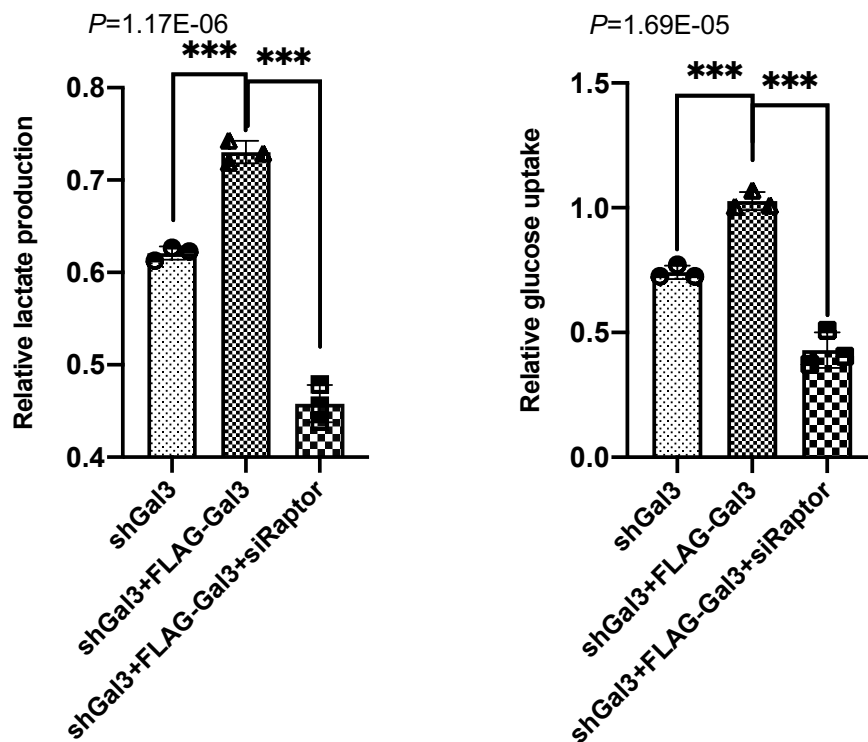

**Supplementary Fig. 3. Galectin-3 promotes glycolysis through activating the mTORC1 signaling.** **a** HEK-293T cells were treated with siCon, siGal3 or siGal3+siULK1 for western blotting analysis of the indicated proteins. Each experiment was repeated three times with similar results. **b** HEK-293T cells deficient of galectin-3 were transfected with FLAG-Gal3 or FLAG-Gal3+siRaptor for the measurement of glucose uptake and lactate production. Error bars represent mean  $\pm$  SD for biological triplicate experiments. *P* values were calculated by one-way ANOVA (\*\*\*)  $P < 0.001$ .

Supplementary Fig. 4

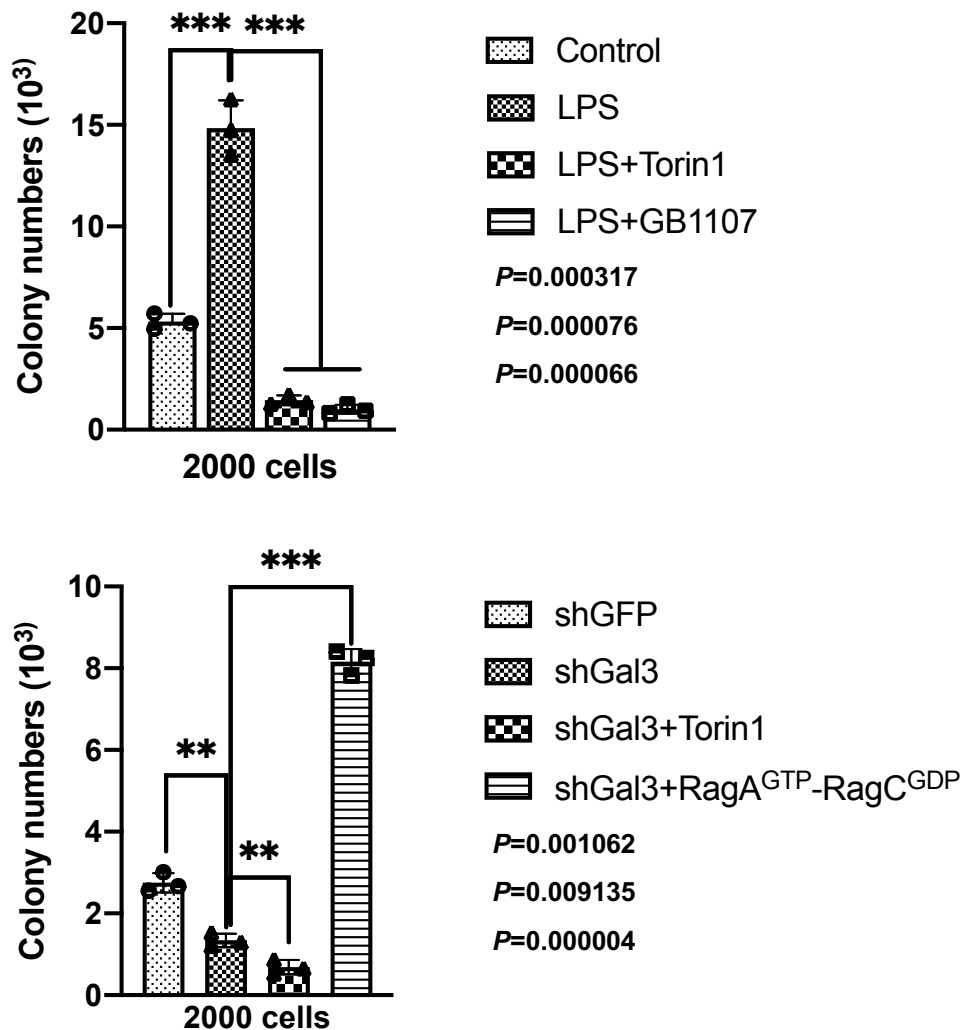

**Supplementary Fig. 4. Galectin-3 is implicated in hepatocarcinogenesis.** HepG2 cells were treated with LPS, LPS+Torin 1, or LPS+GB1107, or infected with lentiviruses carrying shGFP or shGal3 and transfected with FLAG-RagA<sup>GTP</sup>/RagC<sup>GDP</sup> in the presence or absence of Torin 1 and cultured for 10 days before staining with crystal violet for colony formation assays. The number of colony was counted. Error bars represent mean  $\pm$  SD for biological triplicate experiments. *P* values were calculated by two-tailed unpaired Student's *t* test (\*\**P* < 0.01, \*\*\**P* < 0.001).
